# Supplementary material for: Pasta from Red Lentils (Lens culinaris): The Effect of Pasta-Making Process on Starch and Protein Features, and Cooking Behavior
Source: MDPI journal article supplement (doi:10.3390/foods11244040), 2022-12-14
Supplement: s1 [file s1]

## Supplementary material

**Table S1.** Chemical composition of experimental pasta samples from red lentils.

| Samples | Moisture | Carbohydrates | Proteins | Lipids | Ash | Total fiber | Soluble fiber | Insoluble fiber |
|---------|----------|---------------|----------|--------|-----|-------------|---------------|-----------------|
| C_R     | 8.9      | 53.5          | 24.3     | 2.0    | 2.6 | 8.7         | 1.4           | 7.3             |
| EC_R    | 8.8      | 53.9          | 24.8     | 2.3    | 2.5 | 7.7         | 1.1           | 6.6             |
| C_HT    | 8.6      | 56.9          | 23.0     | 2.3    | 2.2 | 7.0         | 0.9           | 6.1             |

Data are expressed as g/100 g raw sample (wet basis).

C\_R. pasta from raw red lentils by conventional extrusion; EC\_R. pasta from raw red lentils by extrusion-cooking; C\_HT. pasta from heat treated red lentils by conventional extrusion.

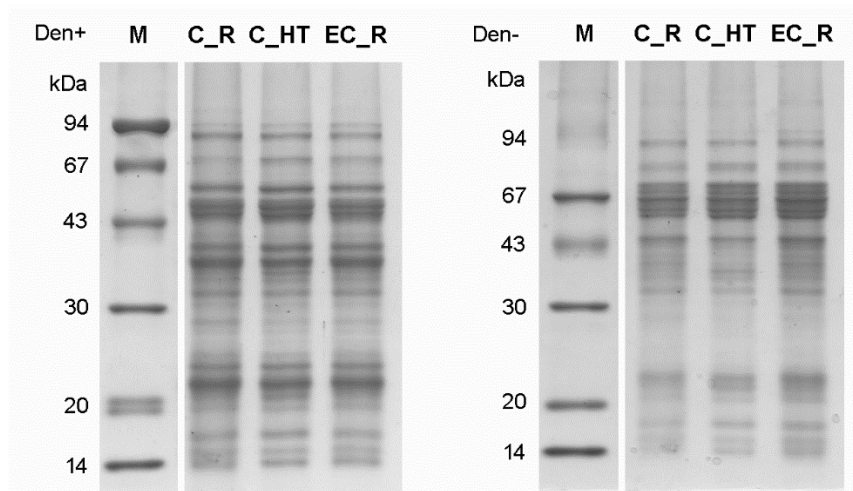

**Supplementary Figure S1.** SDS-PAGE of C\_R, C\_HT, and EC\_R samples. Left, reducing conditions (Den+); right: non-reducing conditions (Den-). M, markers; C\_R, pasta from raw red lentils by conventional extrusion; C\_HT, pasta from heat treated red lentils by conventional extrusion; EC\_R, pasta from raw red lentils by extrusion-cooking.
